# Supplementary material for: Hierarchical and stage-specific regulation of murine cardiomyocyte maturation by serum response factor
Source: PubMed Central journal article supplement (PMC6155060; doi:10.1038/s41467-018-06347-2), 2018-09-21
Supplement: 41467_2018_6347_MOESM1_ESM.pdf [file 41467_2018_6347_MOESM1_ESM.pdf]

**Hierarchical and stage-specific regulation of murine cardiomyocyte maturation by serum response factor**

Guo et al.

Supplementary Information

9 Supplementary Figures

5 Supplementary Tables

Supplementary References

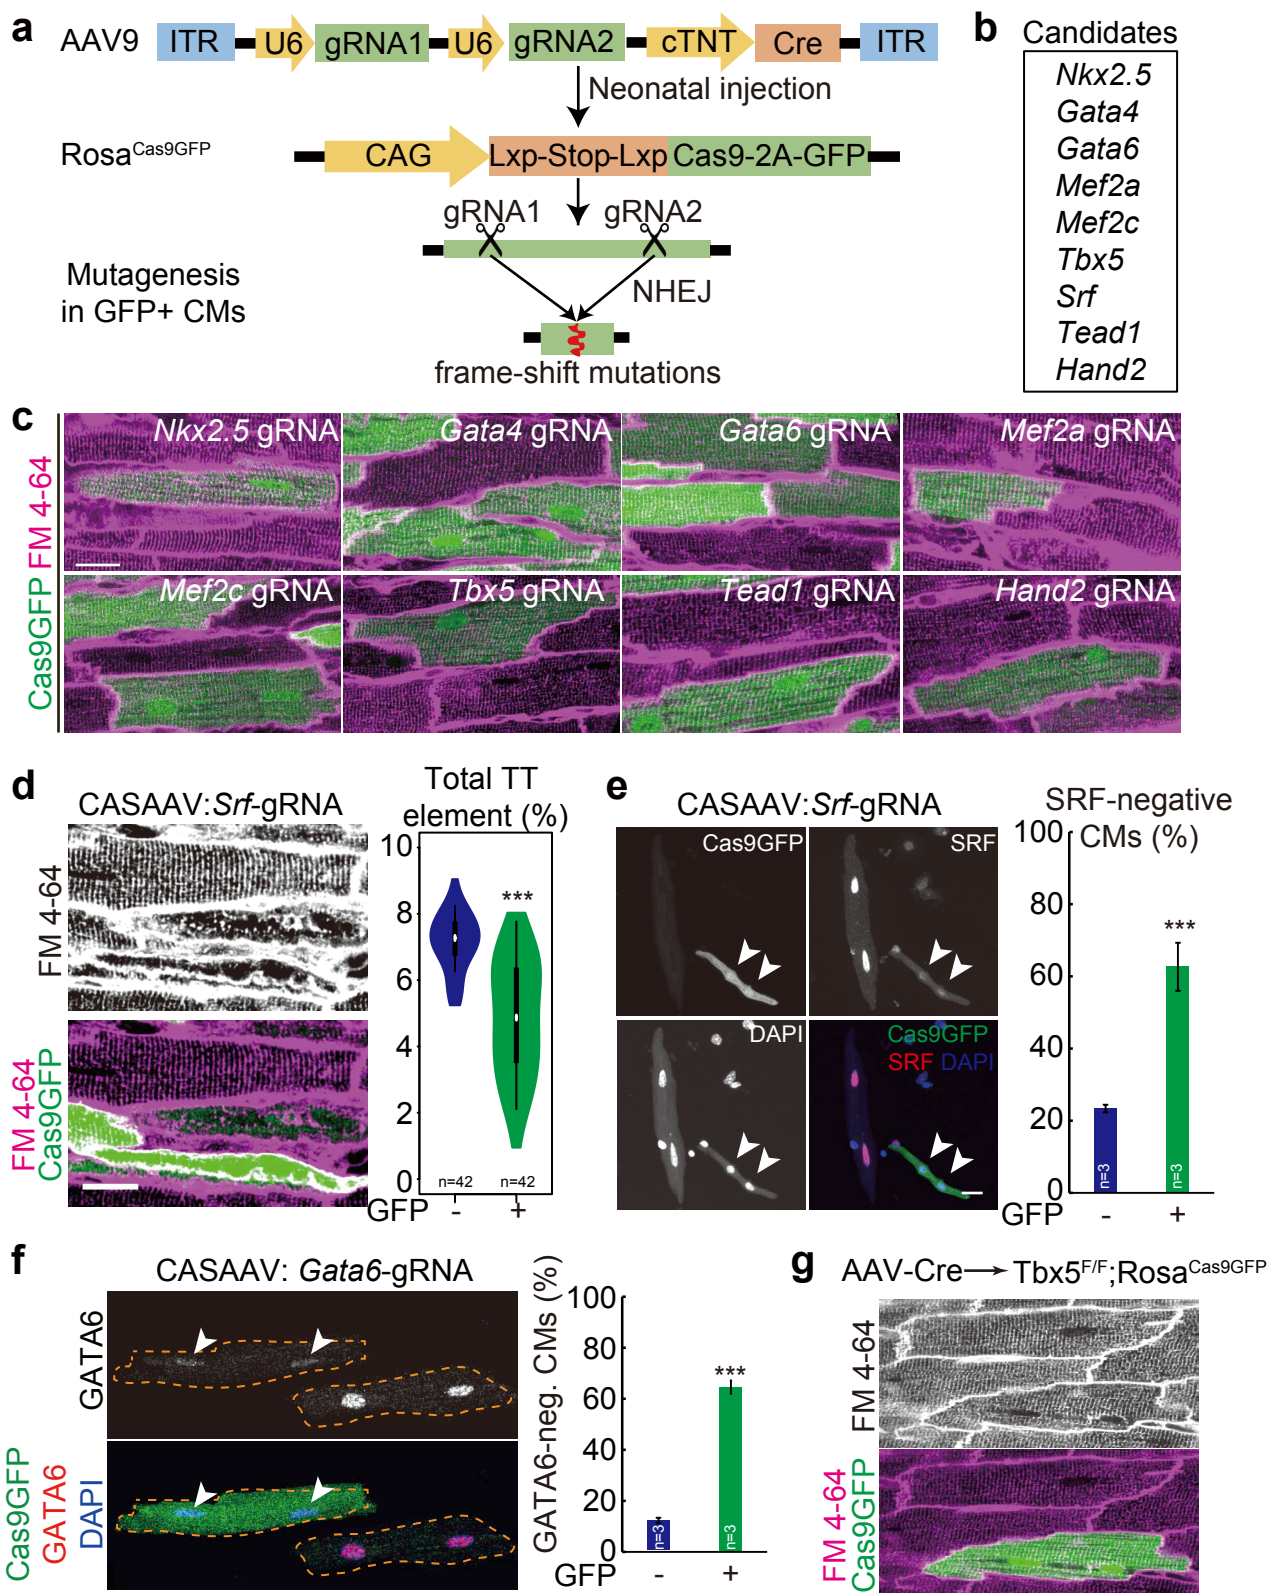

**Supplementary Figure 1. CASAAB-based genetic screen identified an essential role of *Srf* in T-tubule maturation.**

**a**, Schematic representation of CASAAB based gene inactivation. AAVs were injected into P1 pups, phenotypic analyses performed one month later. **b**, Candidate cardiac TFs screened by CASAAB for effects on T-tubule maturation. **c**, Representative images of unaltered T-tubule organization upon treatment of newborn mice with CASAAB vectors targeting 8 candidates. **d**, CASAAB inactivation of *Srf* caused disruption of T-tubules (TT). **e**, Immunofluorescence validation of SRF depletion in Cas9GFP+ CMs by *Srf*-directed CASAAB vector. Arrows, GFP+ CM lacking SRF immunoreactivity in nuclei. **f**, Immunofluorescence validation of GATA6 depletion by CASAAB. **g**, Validation of a dispensable role of *Tbx5* in T-tubule formation using an established *Tbx5*<sup>F/F</sup> allele. CMs from 3 hearts were analyzed. Quantification was plotted as bar plots (mean ± SD) or violin plots (See figure 2). Two-tailed student's t-test: \*\*\*P<0.001.

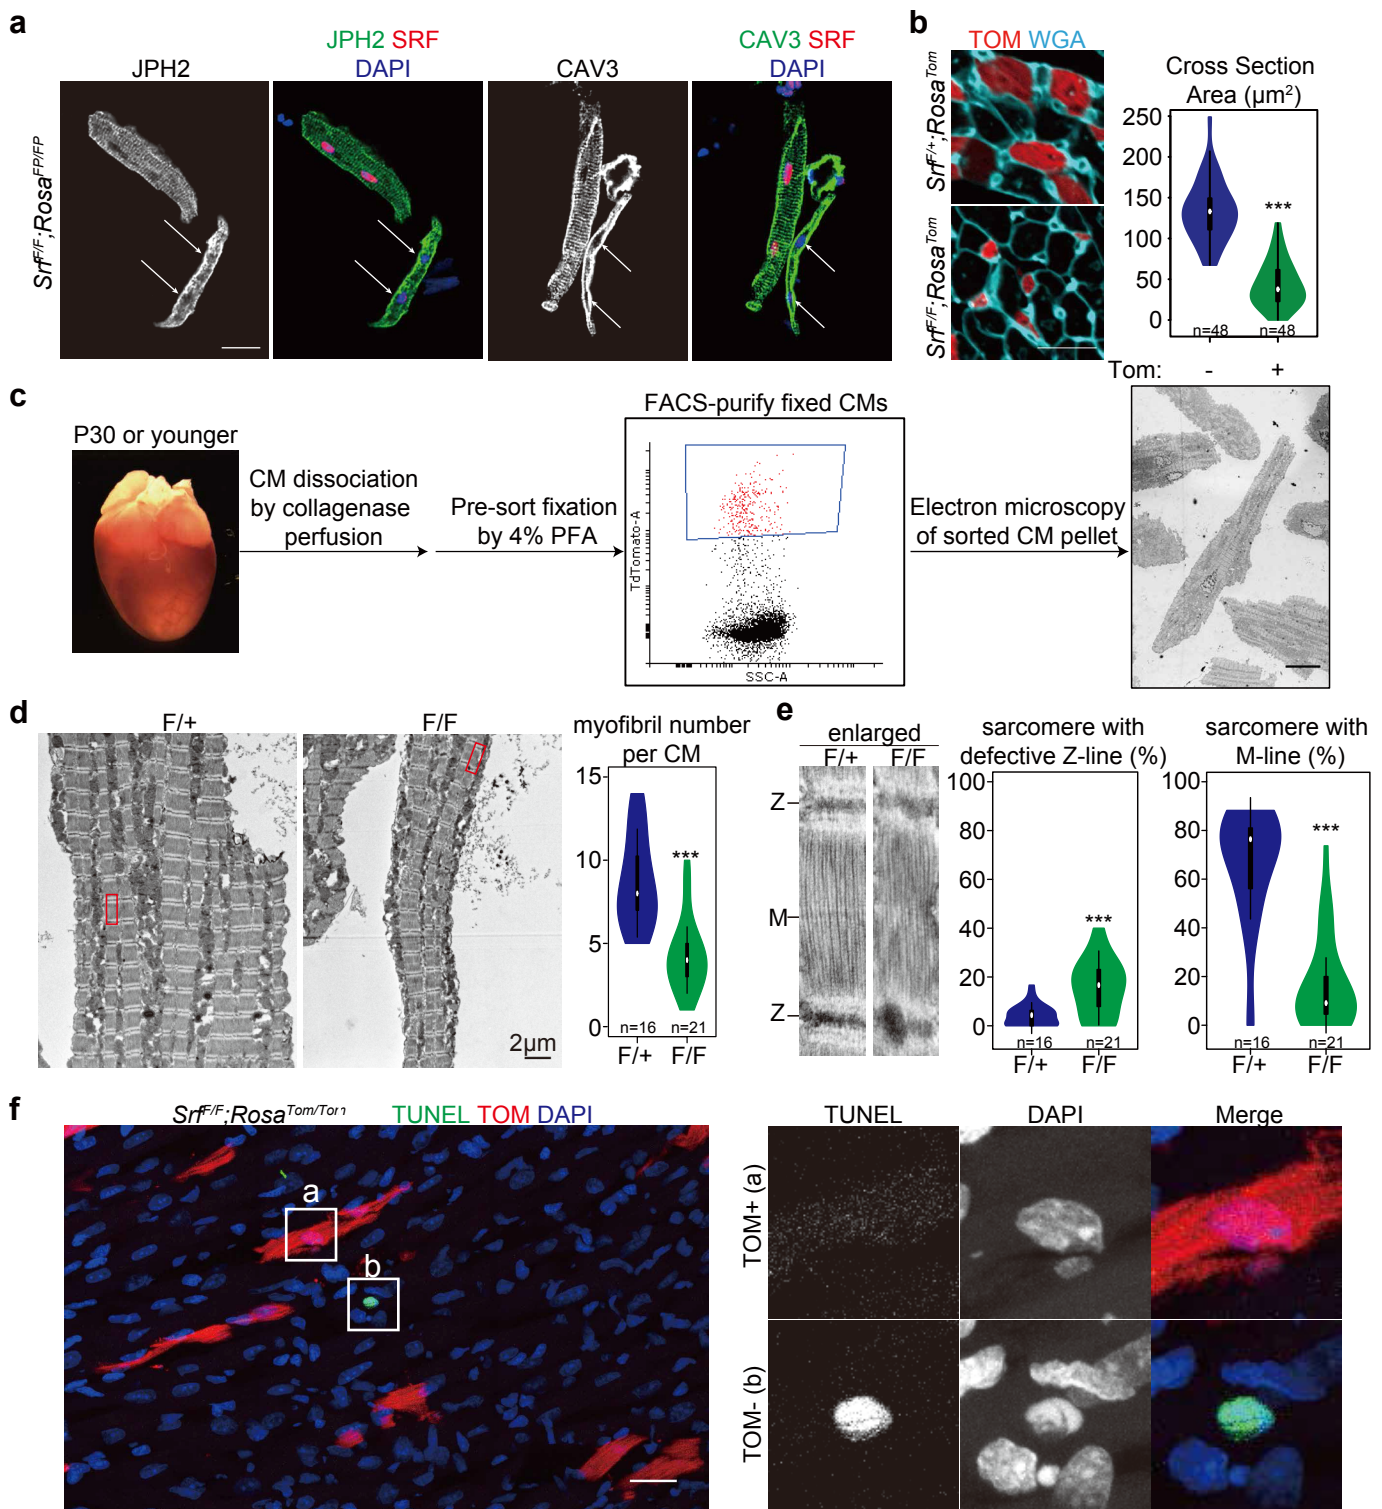

**Supplementary Figure 2. *Srf* is essential for morphological CM maturation.** **a**, Validation of T-tubule phenotypes in isolated *Srf* KO CMs by immunofluorescence of JPH2 and CAV3. Arrows indicated *Srf* KO CMs in which nuclei are depleted of SRF staining. **b**, Validation of cell size phenotypes in *Srf* KO CMs by measuring CM area on heart cross sections. **c-e**, Effect of SRF depletion on sarcomere organization, as determined by FACS-EM. **c**, Method to analyze FACS-sorted CMs by EM. **d-e**, Representative EM images of control and SRF-depleted CMs. Boxed regions in **d** are enlarged in **e**. The fractions of sarcomeres with or without M-lines were quantified per cell images and compared between control and mutant groups in **e**. **f**, TUNEL staining showed no apoptosis in FP+ CMs on one-month-old heart tissue sections. Boxed regions are enlarged to the right. The TUNEL+ nucleus in a FP- cell in (b) shows that TUNEL staining works. Two-tailed student's t-test: \*\* $P < 0.01$ , \*\*\* $P < 0.001$ . Scale bars are 20  $\mu\text{m}$  unless otherwise labeled.

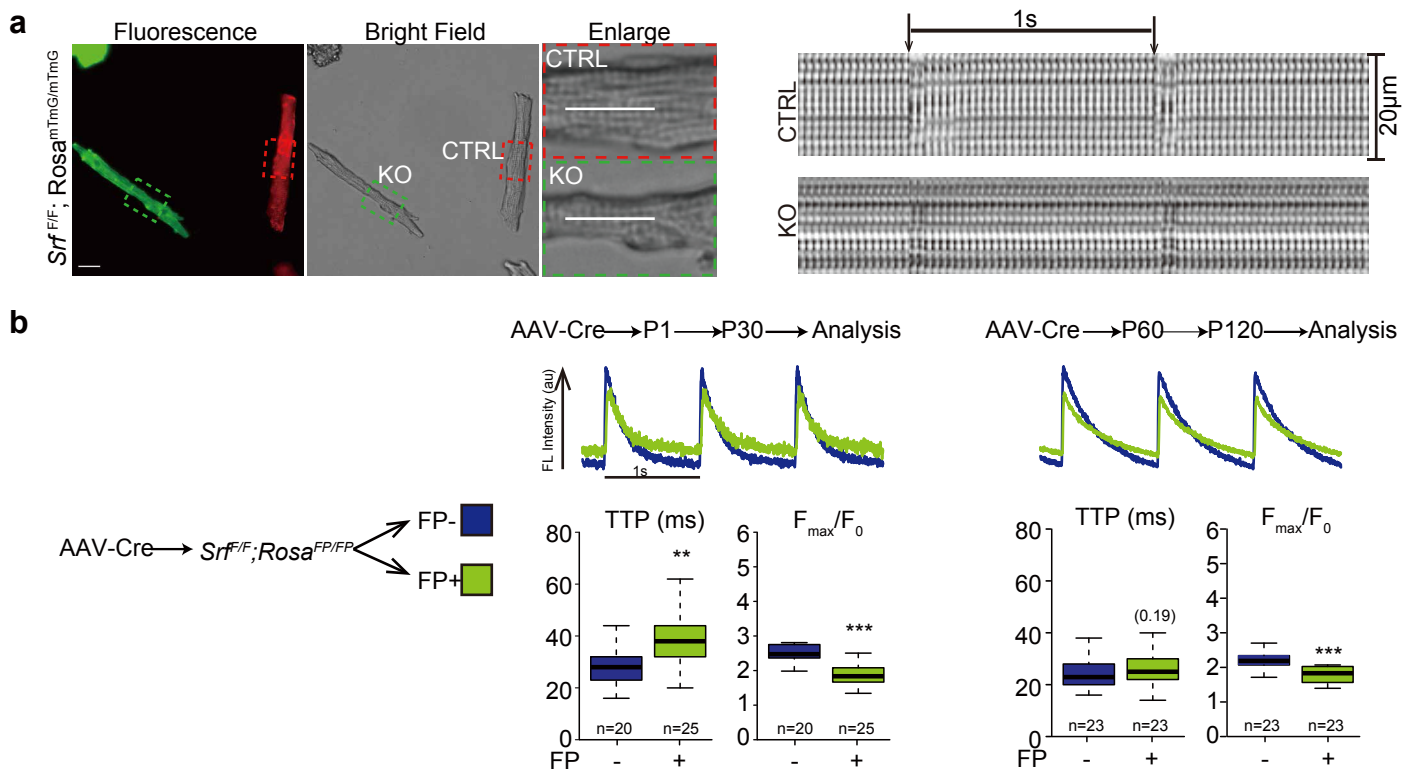

**Supplementary Figure 3. *Srf* is essential for functional maturation of CMs.** **a**, CM contraction assay. Representative epi-fluorescence and brightfield images illustrate classification of cells by FP expression. Boxed regions are enlarged in inset, where white lines indicate regions presented as kymographs to the right. **b**, Effect of neonatal or adult *Srf* KO on calcium transients using Calcium Dye Fluo-4 or Rhod-2. Quantification of time to peak calcium signal (TTP) and peak calcium intensity ( $F_{max}/F_0$ ) are shown in box plots. In box plots, center lines and boxes indicate median and 25th and 75th percentiles. Whiskers extend 1.5 times the interquartile range from the 25th and 75th percentiles. Two-tailed student's t-test: \*\* $P < 0.01$ , \*\*\* $P < 0.001$ .

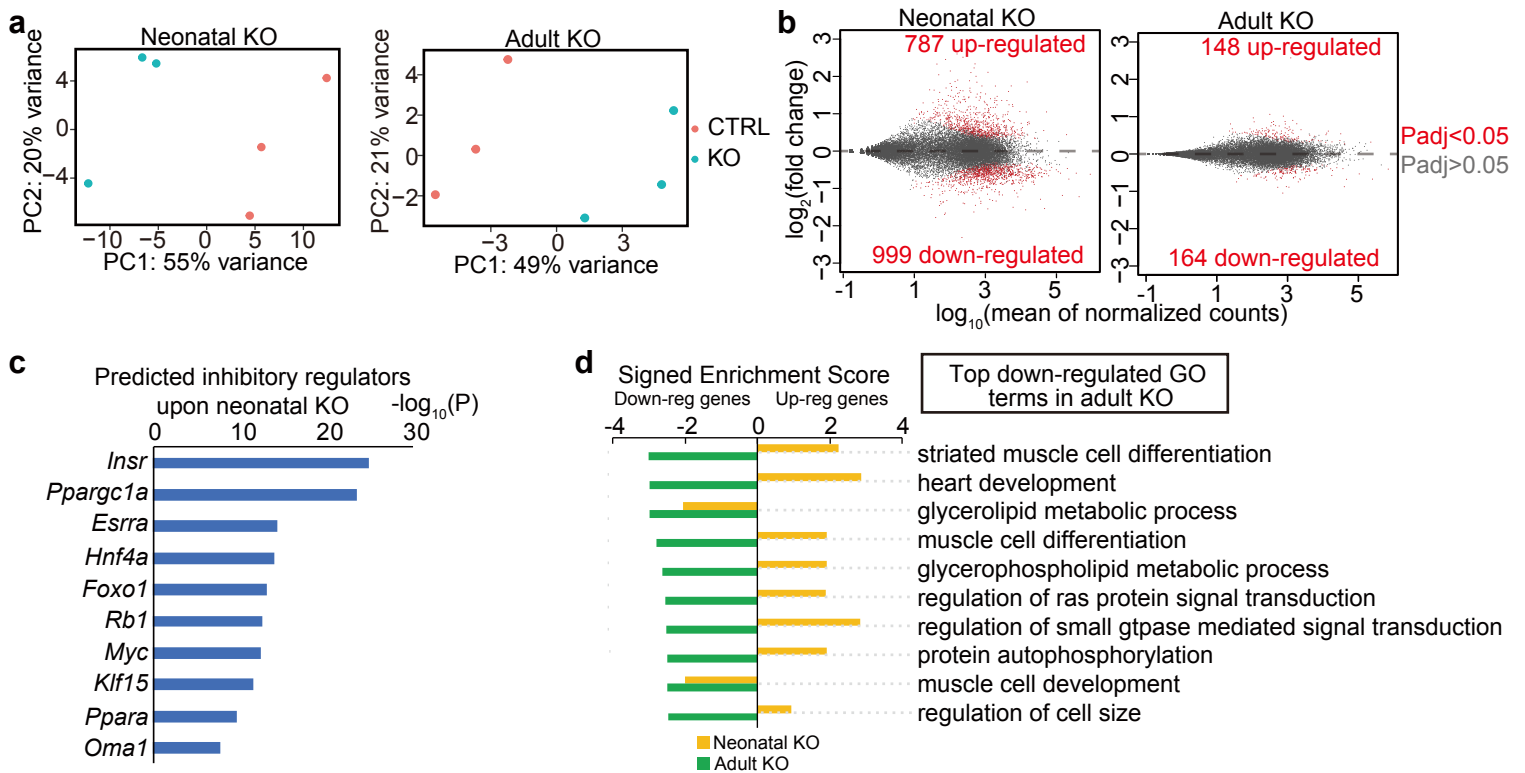

**Supplementary Figure 4. Maturation-specific transcriptional regulation by *Srf*.** **a**, Individual PCA plots of RNA-seq data in *Srf* neonatal or adult KO models. **b**, MA plots of gene expression vs. normalized gene read counts in *Srf* neonatal or adult KO models. Differentially expressed genes are colored red. **c**, IPA upstream regulator analysis predicted inhibitory factors in *Srf* neonatal KO data. **d**, Comparative GSEA analysis of the same GO terms in both neonatal and adult *Srf* KO models. Signed normalized enrichment scores of top down-regulated GO terms in adult *Srf* KO model were plotted.

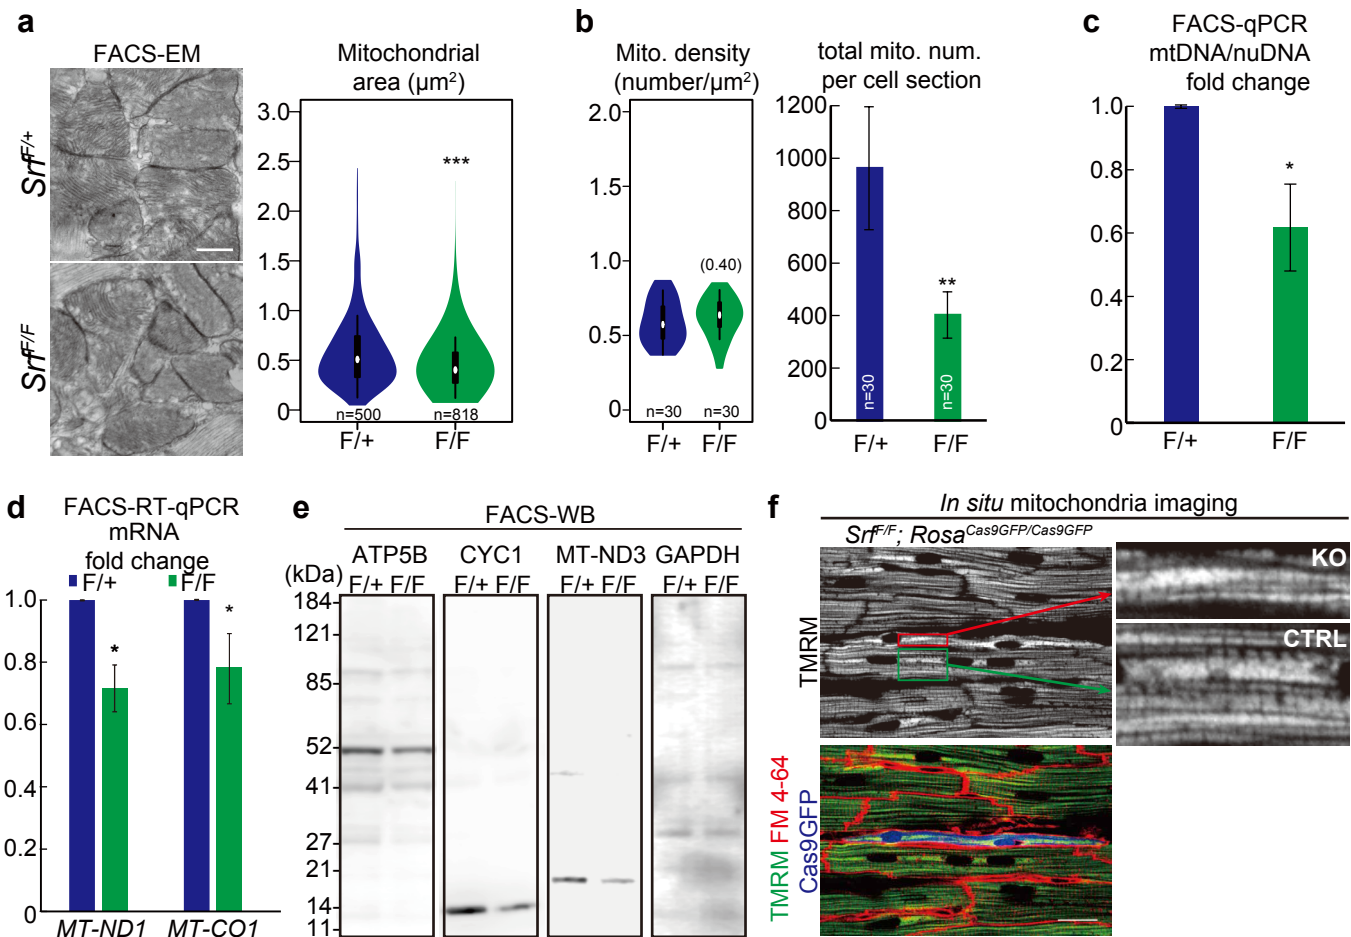

**Supplementary Figure 5. *Srf* regulates mitochondrial maturation.** **a-b**, Effect of *Srf* neonatal KO on mitochondria as assessed by FACS-EM. Representative FACS-EM images of mutant and control mitochondria are shown to the left. Scale bar, 500 nm. Indicated parameters were quantified from FACS-EM images. **c**, Effect of *Srf* neonatal KO on mitochondrial DNA copy number. qPCR analysis of mitochondrial DNA (mtDNA) to nuclear DNA (nuDNA) ratio in FACS-sorted FP+ CMs. n=4 hearts per group. **d**, RT-qPCR analysis of the expression of mitochondria-encoded genes in FACS-sorted FP+ CMs. n=4 hearts per group. **e**, Western blot analysis of mitochondrial proteins or GAPDH controls in FACS-sorted FP+ CMs. **f**, *In situ* imaging of mitochondria by TMRM labeling. Scale bar, 20  $\mu\text{m}$ . Two-tailed student's *t*-test: \* $P < 0.05$ , \*\* $P < 0.01$ , \*\*\* $P < 0.001$ . Non-significant *P* values were labelled in parentheses. Markings on violin plots are described in Figure 1. Bar plots indicate mean  $\pm$  SD.

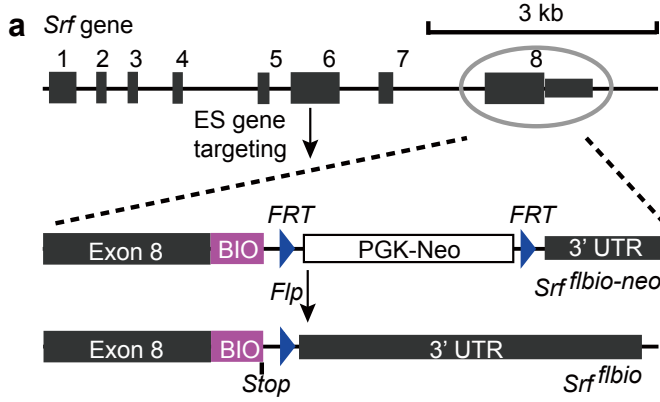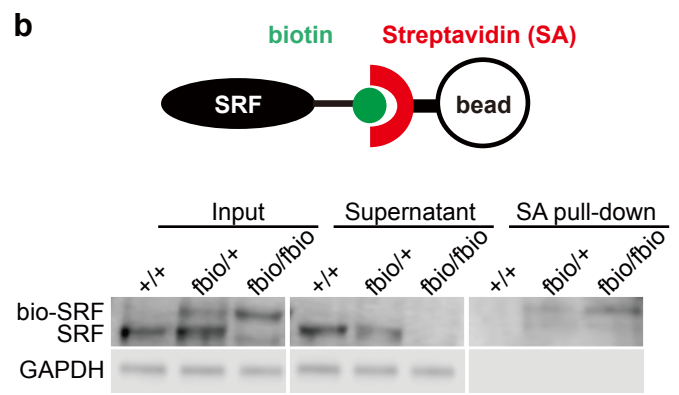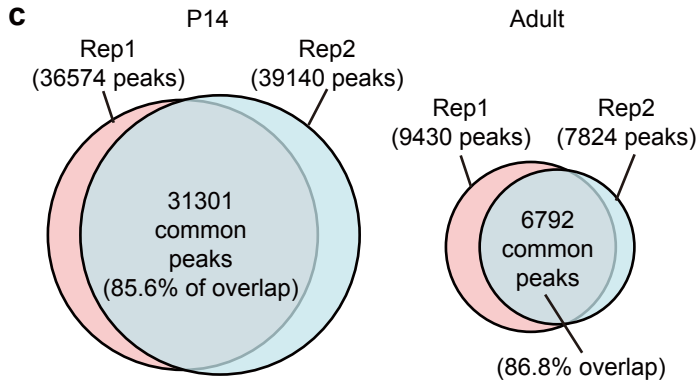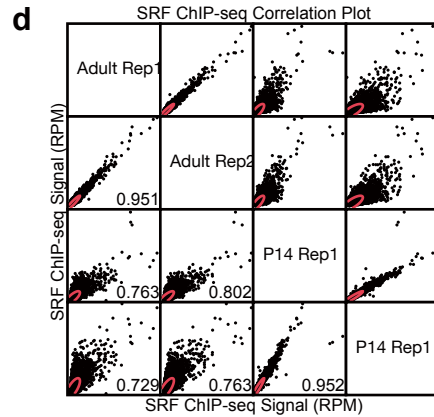

**Supplementary Figure 6. BioChIP-seq analysis of developmental changes in SRF chromatin occupancy.** **a**, Schematic of the generation of *Srf<sup>flbio</sup>* knock-in mice. **b**, Western blot analysis of streptavidin (SA) pull-down validates biotin labeling of endogenous SRF protein. **c**, Biological repeats show consistent identification of SRF-bound regions at P14 and adult stages by MACS2. **d**, Pair-wise correlation of bioChIP-seq signal between individual P14 and adult data. Correlation coefficients are labeled in the plots.

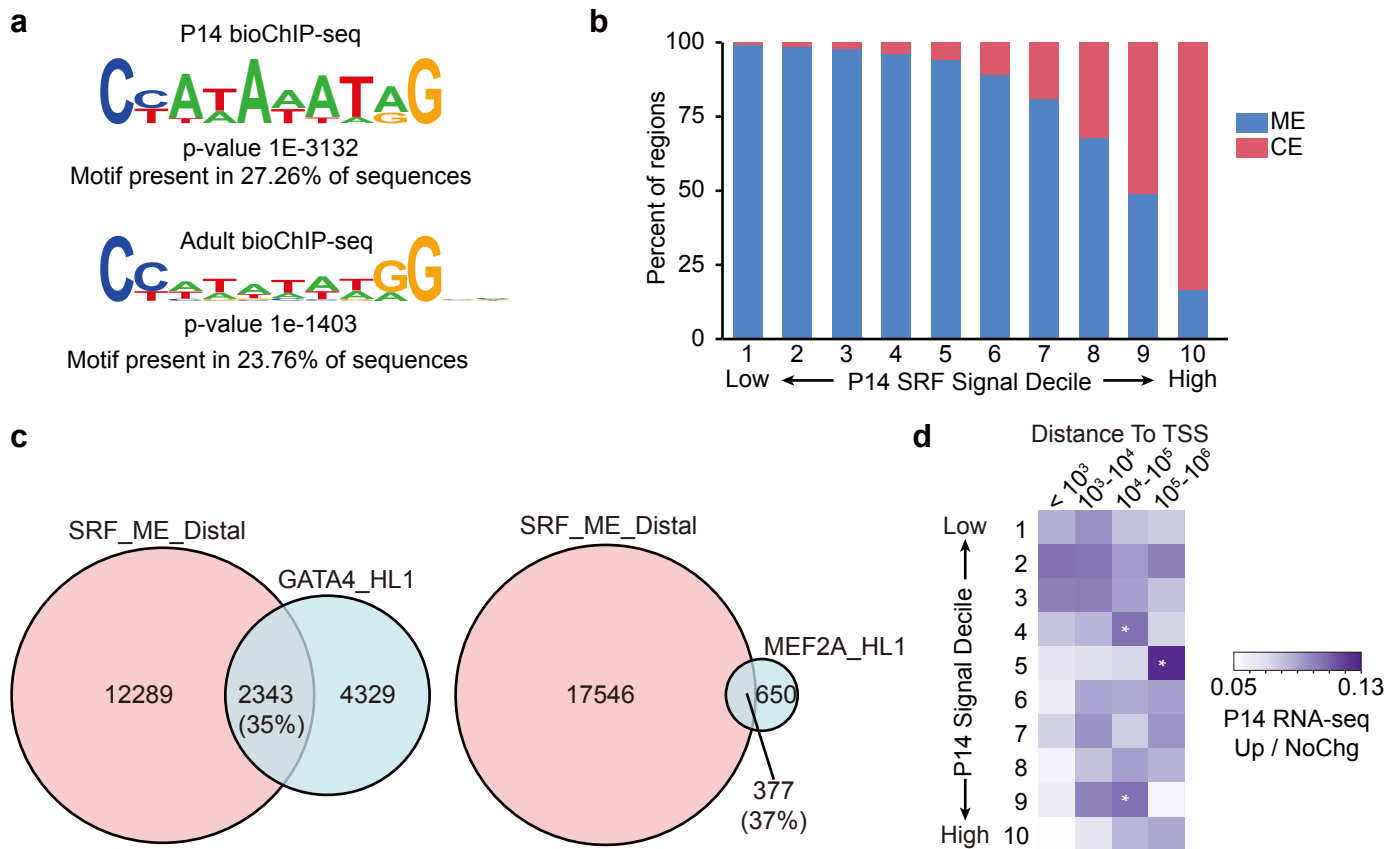

**Supplementary Figure 7. BioChIP-seq analysis of developmental changes in SRF chromatin occupancy.** **a**, *De novo* motif discovery identified the SRF binding motif as the top hit in both P14 and adult stages. **b**, Relationship between SRF occupancy signal at P14 and persistence of SRF occupancy in adult heart. ME and CE indicate regions occupied by SRF only at P14 or at P14 plus adult, respectively. **c**, Venn diagram showing overlap between distal maturation-specific Srf elements and GATA4- or MEF2A-bound regions that were previously found in HL1 cells. **d**, Relationship between SRF occupancy signal and distance to adjacent TSS with likelihood of gene upregulation. One-tailed Fisher exact test: \*P<0.05.



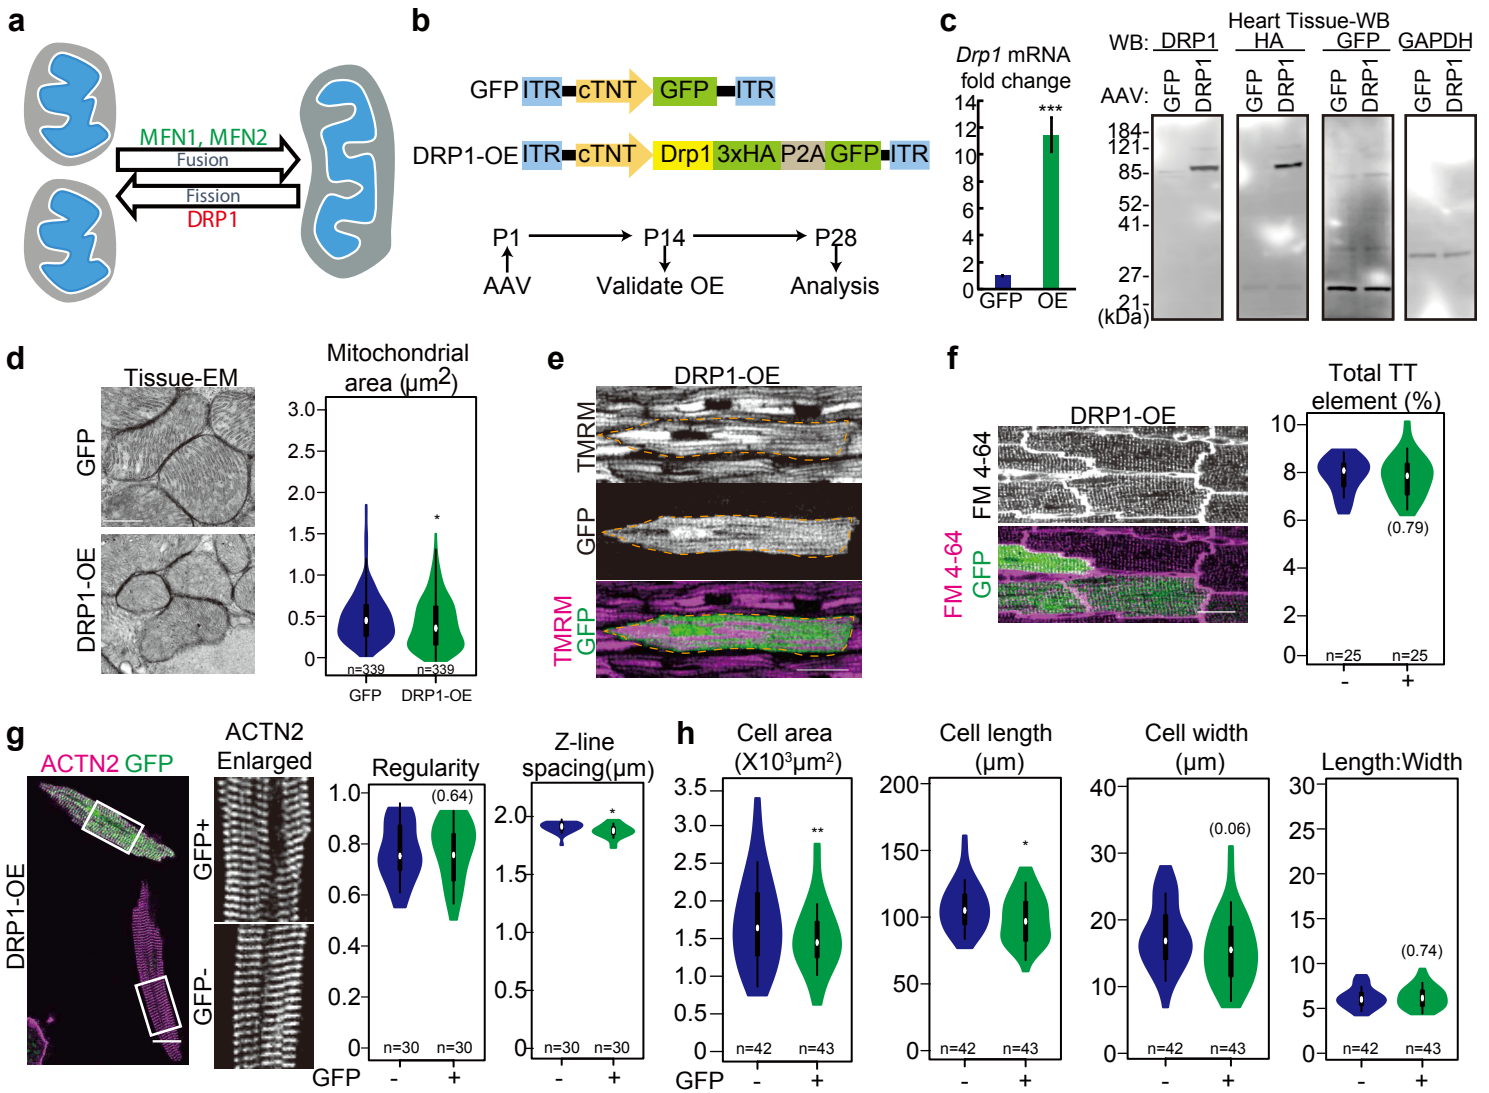

**Supplementary Figure 8. *Drp1* overexpression exerts a minor impact on CM maturation.** **a**, Schematic overview of *Drp1* as a mitochondrial fission activator, counteracting the role of Mfn1/2 in mitochondrial dynamics. **b**, Experimental design of perinatal overexpression of DRP1. **c**, more than ten folds of DRP1 overexpression was validated by RT-qPCR (left,  $n = 4$  hearts) and Western blot (right) in heart tissues that were infected with a high dose of AAVs ( $2 \times 10^{10}$  vg/g). **d**, EM analysis validated decreased mitochondria size upon DRP1 overexpression in heart tissues that were infected with a high dose of AAVs. **e**, Mitochondria organization by TMRM staining and in situ imaging. **f**, In situ T-tubule imaging and AutoTT analysis revealed no T-tubule defects in DRP1-overexpressing CMs. **g-h**, a minor defect in z-line spacing (**g**) and cell size (**h**) could be detected in DRP1-overexpressing CMs. Two-tailed student's t-test: \* $P < 0.05$ , \*\* $P < 0.01$ , \*\*\* $P < 0.001$ . Non-significant P values are shown in parentheses. Scale bar, 20  $\mu\text{m}$ . Markings used in violin plots are described in Figure 2.

Figure 5c  
MFN1 MFN2 GAPDH

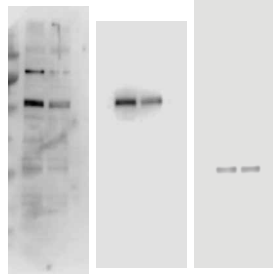

Supplementray Figure 5e  
ATP5B CYC1 MT-ND3 GAPDH

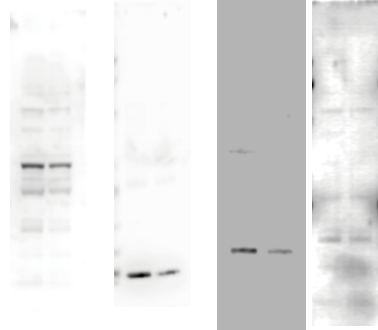

Supplementray Figure 6b

SRF SRF GAPDH

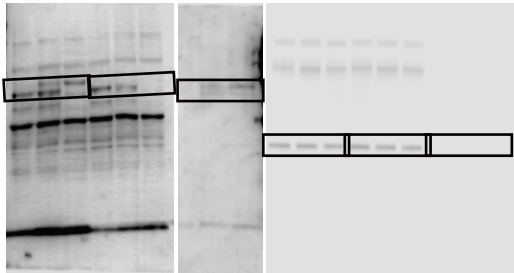

Supplementray Figure 8c

DRP1 HA GFP GAPDH

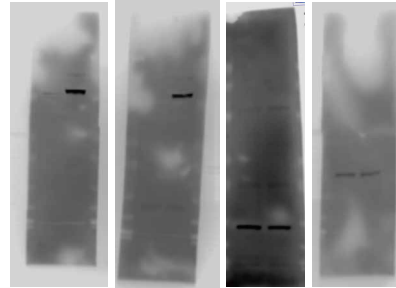

**Supplementary Figure 9.** Uncropped Western blot results that were presented in other figures.

**Supplementary Table 1. CASAAV gRNA design**

| <b>Gene</b>     | <b>gRNA1</b>         | <b>gRNA2</b>         | <b>Mutagenesis validation</b> |
|-----------------|----------------------|----------------------|-------------------------------|
| <i>Gata4</i> *  | GAGAGAGTGTGTCAATTGTG | na                   | Validated depletion by IF     |
| <i>Gata6</i>    | GCTCTATATGAAACTCCATG | na                   | Validated depletion by IF     |
| <i>Tbx5</i> *   | TGGCCTGGCGCGCACGCCTC | CAAGTCTCCATCATCCCCGC | Validated by floxed alleles   |
| <i>Srf</i>      | GGGACTCGCGGGGCGAACGG | TCTTGATCTTCACGCGGCC  | Validated depletion by IF     |
| <i>Mef2a</i>    | TCACACGCATAATGGATGAG | ACATTTCTATGTAGCGTGGC | Not validated                 |
| <i>Mef2c</i> *  | ACAACGAGCCGCACGAGAGC | CCATGTCAGTGCTGGCGTAC | Not validated                 |
| <i>Nkx2.5</i> * | TGGCCTCGAGGCGCGCAGAC | GACCCTCGGGCGGATAAAAA | Validated depletion by IF     |
| <i>Tead1</i> *  | CCGATTGACAACGACGCGGA | TGGCTATCTATCCGCCGTGT | Validated depletion by IF     |
| <i>Hand2</i>    | CGGCACCGCTGGCGTACTCG | CCAACCGCAAGGAGCGGCGC | Not validated                 |
| <i>Myh6</i>     | CAGGCACGAAGCACTCCGTG | CGCCCAGATGGCTGACTTCG | Validated depletion by IF     |

\*The same gRNAs were also used in our previous studies<sup>1,2</sup>.

IF = immunofluorescent imaging

**Supplementary Table 2. QPCR and RT-PCR Primers**

| <b>Target</b>                  | <b>Primer 1</b>           | <b>Primer 2</b>            | <b>Assay</b>   |
|--------------------------------|---------------------------|----------------------------|----------------|
| <i>Nppa</i>                    | TTCCTCGTCTTGGCCTTTTG      | CCTCATCTTCTACCGGCATC       | Sybr Green     |
| <i>Nppb</i>                    | GTCCAGCAGAGACCTCAAAA      | AGGCAGAGTCAGAAACTGGA       | Sybr Green     |
| MT-CO1                         | TGAAACCCCCAGCCATAAC       | GGGTGCCCAAAGAATCAGA        | Sybr Green     |
| MT-ND1                         | GCCCCCTTCGACCTGACA        | CGGAAGCGTGGATAAGATGC       | Sybr Green     |
| <i>Gapdh</i>                   | AGGTCGGTGTGAACGGATTTG     | TGTAGACCATGTAGTTGAGGTCA    | Sybr Green     |
| AAV-titer                      | TCGGGATAAAAGCAGTCTGG      | CCCAAGCTATTGTGTGGCCT       | Sybr Green     |
| mtDNA                          | CCTATCACCCCTTGCCATCAT     | GAGGCTGTTGCTTGTGTGAC       | Sybr Green     |
| nuDNA                          | TTGTCTCCTGCGACTTCAAC      | GTCATACCAGGAAATGAGCTTG     | Sybr Green     |
| Myh6<br>deletion by<br>CASA AV | CAGGATTCTCTGAAAAGTTAACCAG | CCCCTTCCC GGGACACGACCTTGGC | RT-PCR primers |

**Supplementary Table 3. Antibodies**

| <b>Antigen</b> | <b>Host Species</b> | <b>Vendor</b>     | <b>Cat. #</b> | <b>Working concentration</b> | <b>Application</b> |
|----------------|---------------------|-------------------|---------------|------------------------------|--------------------|
| SRF            | Rabbit              | Santa Cruz        | sc-335        | 1:200<br>1:2000              | IF<br>WB           |
| ACTN2          | Mouse               | Abcam             | ab9465        | 1:500                        | IF                 |
| MYH            | Mouse               | DSHB              | A4.1025       | 1:1000                       | IF                 |
| CAV3           | Goat                | Santa Cruz        | sc-7665       | 1:250                        | IF                 |
| JPH2           | Rabbit              | Life Technologies | 405300        | 1:250                        | IF                 |
| ATP5B          | Mouse               | Abcam             | ab14730       | 1:2000                       | WB                 |
| CYC1           | Rabbit              | Abcam             | ab90529       | 1:2000                       | WB                 |
| MT-ND3         | Rabbit              | Abcam             | ab204977      | 1:2000                       | WB                 |
| MFN1           | Mouse               | Abcam             | ab57602       | 1:2000                       | WB                 |
| MFN2           | Rabbit              | Abcam             | ab124773      | 1:2000                       | WB                 |
| GAPDH          | Rabbit              | Santa Cruz        | sc-25778      | 1:2000                       | WB                 |
| DRP1           | Rabbit              | Abcam             | ab184247      | 1:2000                       | WB                 |
| HA             | Rabbit              | Abcam             | ab9110        | 1:2000                       | WB                 |

IF = immunofluorescent imaging. WB = western blotting.

**Supplementary Table 4. Dyes**

| <b>Name</b> | <b>Vendor</b> | <b>Cat. #</b> | <b>Working concentration</b> | <b>Application</b>        |
|-------------|---------------|---------------|------------------------------|---------------------------|
| FM 4-64     | Invitrogen    | T-3166        | 2 µg/ml                      | In situ imaging           |
| TMRM        | Invitrogen    | T668          | 200 nM                       | In situ imaging           |
| Fluo-4      | Invitrogen    | F14201        | 5 µM                         | Calcium imaging           |
| Rhod-2      | Invitrogen    | R1245MP       | 5 µM                         | Calcium imaging           |
| WGA-633     | Invitrogen    | W32466        | 5 µg/ml                      | Immunofluorescent imaging |
| DAPI        | Invitrogen    | D3571         | 500 nM                       | Immunofluorescent imaging |

**Supplementary Table 5.**  
**Taqman probes**

| <b>Target</b>      | <b>Assay ID (Thermo Fisher)</b> |
|--------------------|---------------------------------|
| <i>Srf</i>         | Mm00491032_m1                   |
| <i>Mfn1</i>        | Mm00612599_m1                   |
| <i>Mfn2</i>        | Mm00500120_m1                   |
| <i>Myh6</i>        | Mm00440359_m1                   |
| <i>Myh7</i>        | Mm00600555_m1                   |
| <i>Actc1</i>       | Mm00473657_m1                   |
| <i>Tnni1</i>       | Mm00502426_m1                   |
| <i>Tnni3</i>       | Mm00437164_m1                   |
| <i>Gapdh</i>       | Mm99999915_g1                   |
| <i>Drp1(Dnm1l)</i> | Mm01342903_m1                   |

### **Supplementary Reference**

1. Guo, Y. et al. Analysis of Cardiac Myocyte Maturation Using CASA AV, A Platform for Rapid Dissection of Cardiac Myocyte Gene Function In Vivo. *Circ. Res.* (2017). doi:10.1161/CIRCRESAHA.116.310283
2. VanDusen, N. J., Guo, Y., Gu, W. & Pu, W. T. CASA AV: A CRISPR-Based Platform for Rapid Dissection of Gene Function In Vivo. *Curr. Protoc. Mol. Biol.* 120, 31.11.1–31.11.14 (2017).
